# Supplementary material for: Risk prediction model for in-stent restenosis following PCI: a systematic review
Source: Front Cardiovasc Med. 2024 Aug 29;11:1445076. doi: 10.3389/fcvm.2024.1445076 (PMC11390508; doi:10.3389/fcvm.2024.1445076)
Supplement: Supplementary file 1 [file Datasheet1.xlsx]

## Sheet: Original Evaluation Tool
Original Evaluation Tool
Deviation risk
Study subjects	Low risk of bias	High risk of bias	Not clear
	Yes/May be	No/Probably not	No information
Whether the data sources are appropriate
Whether the inclusion and exclusion criteria were appropriate for all study subjects
Risk of bias
Predictors	Low risk of bias	High risk of bias	Not clear
	Yes/May be	No/Probably not	No information
The definition and assessment of predictors were the same for all study subjects
Whether to evaluate predictors without knowing the outcome data
Whether the predictors included in the prediction model are valid or not
Risk of bias
Outcome	Low risk of bias	High risk of bias	Not clear
	Yes/May be	No/Probably not	No information
Whether the classification of the results is reasonable
Whether the definition of the outcome is reasonable
Whether the outcome was defined to exclude predictors
The definition of outcome was the same for all study subjects
Whether the information of predictors was not clear when determining the outcome
Whether the time interval for predictor assessment and outcome determination was reasonable
Risk of bias
Data Analysis	Low risk of bias	High risk of bias	Not clear
	Yes/May be	No/Probably not	No information
Whether the sample size is reasonable
Whether the treatment of continuous and categorical independent variables was justified
Whether all included subjects were included in the statistical analysis
Whether the included subjects with missing data were appropriately processed
Whether the screening of predictors by univariate analysis was avoided
Whether the complexity of the data is considered
Whether to evaluate the prediction model performance
Whether overfitting, underfitting, and optimal fitting of the prediction model were considered
Whether the predictors and their weights are consistent with the reported results
Risk of bias
Overall risk of bias
Applicability	High	Low	Not clear
Subjects
Predictors
Outcome
Overall applicability

## Sheet: Qian et al  
Results of evaluation
Deviation risk
Study subjects	Low risk of bias	High risk of bias	Not clear
	Yes/May be	No/Probably not	No information
Whether the data sources are appropriate	√
Whether the inclusion and exclusion criteria were appropriate for all study subjects		√
Risk of bias		√
Predictors	Low risk of bias	High risk of bias	Not clear
	Yes/May be	No/Probably not	No information
The definition and assessment of predictors were the same for all study subjects			√
Whether to evaluate predictors without knowing the outcome data	√
Whether the predictors included in the prediction model are valid or not	√
Risk of bias			√
Outcome	Low risk of bias	High risk of bias	Not clear
	Yes/May be	No/Probably not	No information
Whether the classification of the results is reasonable	√
Whether the definition of the outcome is reasonable	√
Whether the outcome was defined to exclude predictors		√
The definition of outcome was the same for all study subjects	√
Whether the information of predictors was not clear when determining the outcome		√
Whether the time interval for predictor assessment and outcome determination was reasonable	√
Risk of bias		√
Data Analysis	Low risk of bias	High risk of bias	Not clear
	Yes/May be	No/Probably not	No information
Whether the sample size is reasonable		√
Whether the treatment of continuous and categorical independent variables was justified			√
Whether all included subjects were included in the statistical analysis	√
Whether the included subjects with missing data were appropriately processed		√
Whether the screening of predictors by univariate analysis was avoided	√
Whether the complexity of the data is considered		√
Whether to evaluate the prediction model performance	√
Whether overfitting, underfitting, and optimal fitting of the prediction model were considered	√
Whether the predictors and their weights are consistent with the reported results		√
Risk of bias		√
Overall risk of bias		√
Applicability	High	Low	Not clear
Subjects		√
Predictors	√
Outcome	√
Overall applicability		√

## Sheet: Bai et al
Results of evaluation
Deviation risk
Study subjects	Low risk of bias	High risk of bias	Not clear
	Yes/May be	No/Probably not	No information
Whether the data sources are appropriate	√
Whether the inclusion and exclusion criteria were appropriate for all study subjects	√
Risk of bias	√
Predictors	Low risk of bias	High risk of bias	Not clear
	Yes/May be	No/Probably not	No information
The definition and assessment of predictors were the same for all study subjects	√
Whether to evaluate predictors without knowing the outcome data	√
Whether the predictors included in the prediction model are valid or not	√
Risk of bias	√
Outcome	Low risk of bias	High risk of bias	Not clear
	Yes/May be	No/Probably not	No information
Whether the classification of the results is reasonable	√
Whether the definition of the outcome is reasonable	√
Whether the outcome was defined to exclude predictors	√
The definition of outcome was the same for all study subjects	√
Whether the information of predictors was not clear when determining the outcome	√
Whether the time interval for predictor assessment and outcome determination was reasonable	√
Risk of bias	√
Data Analysis	Low risk of bias	High risk of bias	Not clear
	Yes/May be	No/Probably not	No information
Whether the sample size is reasonable	√
Whether the treatment of continuous and categorical independent variables was justified			√
Whether all included subjects were included in the statistical analysis		√
Whether the included subjects with missing data were appropriately processed			√
Whether the screening of predictors by univariate analysis was avoided	√
Whether the complexity of the data is considered		√
Whether to evaluate the prediction model performance	√
Whether overfitting, underfitting, and optimal fitting of the prediction model were considered	√
Whether the predictors and their weights are consistent with the reported results		√
Risk of bias		√
Overall risk of bias		√
Applicability	High	Low	Not clear
Subjects	√
Predictors		√
Outcome	√
Overall applicability		√

## Sheet: Wu et al
Results of evaluation
Deviation risk
Study subjects	Low risk of bias	High risk of bias	Not clear
	Yes/May be	No/Probably not	No information
Whether the data sources are appropriate	√
Whether the inclusion and exclusion criteria were appropriate for all study subjects	√
Risk of bias	√
Predictors	Low risk of bias	High risk of bias	Not clear
	Yes/May be	No/Probably not	No information
The definition and assessment of predictors were the same for all study subjects	√
Whether to evaluate predictors without knowing the outcome data		√
Whether the predictors included in the prediction model are valid or not	√
Risk of bias		√
Outcome	Low risk of bias	High risk of bias	Not clear
	Yes/May be	No/Probably not	No information
Whether the classification of the results is reasonable	√
Whether the definition of the outcome is reasonable	√
Whether the outcome was defined to exclude predictors		√
The definition of outcome was the same for all study subjects	√
Whether the information of predictors was not clear when determining the outcome			√
Whether the time interval for predictor assessment and outcome determination was reasonable	√
Risk of bias		√
Data Analysis	Low risk of bias	High risk of bias	Not clear
	Yes/May be	No/Probably not	No information
Whether the sample size is reasonable	√
Whether the treatment of continuous and categorical independent variables was justified	√
Whether all included subjects were included in the statistical analysis	√
Whether the included subjects with missing data were appropriately processed			√
Whether the screening of predictors by univariate analysis was avoided	√
Whether the complexity of the data is considered	√
Whether to evaluate the prediction model performance	√
Whether overfitting, underfitting, and optimal fitting of the prediction model were considered	√
Whether the predictors and their weights are consistent with the reported results			√
Risk of bias			√
Overall risk of bias		√
Applicability	High	Low	Not clear
Subjects	√
Predictors	√
Outcome		√
Overall applicability		√

## Sheet: Jia et al
Results of evaluation
Deviation risk
Study subjects	Low risk of bias	High risk of bias	Not clear
	Yes/May be	No/Probably not	No information
Whether the data sources are appropriate	√
Whether the inclusion and exclusion criteria were appropriate for all study subjects	√
Risk of bias	√
Predictors	Low risk of bias	High risk of bias	Not clear
	Yes/May be	No/Probably not	No information
The definition and assessment of predictors were the same for all study subjects	√
Whether to evaluate predictors without knowing the outcome data		√
Whether the predictors included in the prediction model are valid or not	√
Risk of bias		√
Outcome	Low risk of bias	High risk of bias	Not clear
	Yes/May be	No/Probably not	No information
Whether the classification of the results is reasonable	√
Whether the definition of the outcome is reasonable	√
Whether the outcome was defined to exclude predictors		√
The definition of outcome was the same for all study subjects	√
Whether the information of predictors was not clear when determining the outcome		√
Whether the time interval for predictor assessment and outcome determination was reasonable		√
Risk of bias		√
Data Analysis	Low risk of bias	High risk of bias	Not clear
	Yes/May be	No/Probably not	No information
Whether the sample size is reasonable	√
Whether the treatment of continuous and categorical independent variables was justified	√
Whether all included subjects were included in the statistical analysis	√
Whether the included subjects with missing data were appropriately processed	√
Whether the screening of predictors by univariate analysis was avoided	√
Whether the complexity of the data is considered	√
Whether to evaluate the prediction model performance	√
Whether overfitting, underfitting, and optimal fitting of the prediction model were considered		√
Whether the predictors and their weights are consistent with the reported results			√
Risk of bias			√
Overall risk of bias		√
Applicability	High	Low	Not clear
Subjects		√
Predictors	√
Outcome	√
Overall applicability		√

## Sheet: Scafa-udriste et al
Results of evaluation
Deviation risk
Study subjects	Low risk of bias	High risk of bias	Not clear
	Yes/May be	No/Probably not	No information
Whether the data sources are appropriate	√
Whether the inclusion and exclusion criteria were appropriate for all study subjects		√
Risk of bias		√
Predictors	Low risk of bias	High risk of bias	Not clear
	Yes/May be	No/Probably not	No information
The definition and assessment of predictors were the same for all study subjects	√
Whether to evaluate predictors without knowing the outcome data		√
Whether the predictors included in the prediction model are valid or not	√
Risk of bias		√
Outcome	Low risk of bias	High risk of bias	Not clear
	Yes/May be	No/Probably not	No information
Whether the classification of the results is reasonable	√
Whether the definition of the outcome is reasonable	√
Whether the outcome was defined to exclude predictors	√
The definition of outcome was the same for all study subjects	√
Whether the information of predictors was not clear when determining the outcome	√
Whether the time interval for predictor assessment and outcome determination was reasonable	√
Risk of bias	√
Data Analysis	Low risk of bias	High risk of bias	Not clear
	Yes/May be	No/Probably not	No information
Whether the sample size is reasonable	√
Whether the treatment of continuous and categorical independent variables was justified	√
Whether all included subjects were included in the statistical analysis	√
Whether the included subjects with missing data were appropriately processed	√
Whether the screening of predictors by univariate analysis was avoided	√
Whether the complexity of the data is considered	√
Whether to evaluate the prediction model performance	√
Whether overfitting, underfitting, and optimal fitting of the prediction model were considered	√
Whether the predictors and their weights are consistent with the reported results	√
Risk of bias	√
Overall risk of bias		√
Applicability	High	Low	Not clear
Subjects	√
Predictors		√
Outcome	√
Overall applicability		√

## Sheet: Guldener et al
Results of evaluation
Deviation risk
Study subjects	Low risk of bias	High risk of bias	Not clear
	Yes/May be	No/Probably not	No information
Whether the data sources are appropriate	√
Whether the inclusion and exclusion criteria were appropriate for all study subjects		√
Risk of bias		√
Predictors	Low risk of bias	High risk of bias	Not clear
	Yes/May be	No/Probably not	No information
The definition and assessment of predictors were the same for all study subjects	√
Whether to evaluate predictors without knowing the outcome data	√
Whether the predictors included in the prediction model are valid or not	√
Risk of bias	√
Outcome	Low risk of bias	High risk of bias	Not clear
	Yes/May be	No/Probably not	No information
Whether the classification of the results is reasonable	√
Whether the definition of the outcome is reasonable	√
Whether the outcome was defined to exclude predictors	√
The definition of outcome was the same for all study subjects	√
Whether the information of predictors was not clear when determining the outcome	√
Whether the time interval for predictor assessment and outcome determination was reasonable	√
Risk of bias	√
Data Analysis	Low risk of bias	High risk of bias	Not clear
	Yes/May be	No/Probably not	No information
Whether the sample size is reasonable	√
Whether the treatment of continuous and categorical independent variables was justified	√
Whether all included subjects were included in the statistical analysis	√
Whether the included subjects with missing data were appropriately processed			√
Whether the screening of predictors by univariate analysis was avoided	√
Whether the complexity of the data is considered	√
Whether to evaluate the prediction model performance	√
Whether overfitting, underfitting, and optimal fitting of the prediction model were considered	√
Whether the predictors and their weights are consistent with the reported results	√
Risk of bias			√
Overall risk of bias		√
Applicability	High	Low	Not clear
Subjects	√
Predictors	√
Outcome	√
Overall applicability	√

## Sheet: Coughlan et al
Results of evaluation
Deviation risk
Study subjects	Low risk of bias	High risk of bias	Not clear
	Yes/May be	No/Probably not	No information
Whether the data sources are appropriate	√
Whether the inclusion and exclusion criteria were appropriate for all study subjects		√
Risk of bias		√
Predictors	Low risk of bias	High risk of bias	Not clear
	Yes/May be	No/Probably not	No information
The definition and assessment of predictors were the same for all study subjects	√
Whether to evaluate predictors without knowing the outcome data	√
Whether the predictors included in the prediction model are valid or not	√
Risk of bias	√
Outcome	Low risk of bias	High risk of bias	Not clear
	Yes/May be	No/Probably not	No information
Whether the classification of the results is reasonable	√
Whether the definition of the outcome is reasonable	√
Whether the outcome was defined to exclude predictors	√
The definition of outcome was the same for all study subjects	√
Whether the information of predictors was not clear when determining the outcome	√
Whether the time interval for predictor assessment and outcome determination was reasonable	√
Risk of bias	√
Data Analysis	Low risk of bias	High risk of bias	Not clear
	Yes/May be	No/Probably not	No information
Whether the sample size is reasonable	√
Whether the treatment of continuous and categorical independent variables was justified	√
Whether all included subjects were included in the statistical analysis	√
Whether the included subjects with missing data were appropriately processed			√
Whether the screening of predictors by univariate analysis was avoided	√
Whether the complexity of the data is considered	√
Whether to evaluate the prediction model performance	√
Whether overfitting, underfitting, and optimal fitting of the prediction model were considered	√
Whether the predictors and their weights are consistent with the reported results	√
Risk of bias			√
Overall risk of bias		√
Applicability	High	Low	Not clear
Subjects	√
Predictors		√
Outcome	√
Overall applicability		√

## Sheet: Jiang et al 
Results of evaluation
Deviation risk
Study subjects	Low risk of bias	High risk of bias	Not clear
	Yes/May be	No/Probably not	No information
Whether the data sources are appropriate	√
Whether the inclusion and exclusion criteria were appropriate for all study subjects		√
Risk of bias		√
Predictors	Low risk of bias	High risk of bias	Not clear
	Yes/May be	No/Probably not	No information
The definition and assessment of predictors were the same for all study subjects			√
Whether to evaluate predictors without knowing the outcome data	√
Whether the predictors included in the prediction model are valid or not	√
Risk of bias			√
Outcome	Low risk of bias	High risk of bias	Not clear
	Yes/May be	No/Probably not	No information
Whether the classification of the results is reasonable	√
Whether the definition of the outcome is reasonable	√
Whether the outcome was defined to exclude predictors	√
The definition of outcome was the same for all study subjects	√
Whether the information of predictors was not clear when determining the outcome	√
Whether the time interval for predictor assessment and outcome determination was reasonable	√
Risk of bias	√
Data Analysis	Low risk of bias	High risk of bias	Not clear
	Yes/May be	No/Probably not	No information
Whether the sample size is reasonable	√
Whether the treatment of continuous and categorical independent variables was justified	√
Whether all included subjects were included in the statistical analysis	√
Whether the included subjects with missing data were appropriately processed	√
Whether the screening of predictors by univariate analysis was avoided	√
Whether the complexity of the data is considered	√
Whether to evaluate the prediction model performance	√
Whether overfitting, underfitting, and optimal fitting of the prediction model were considered	√
Whether the predictors and their weights are consistent with the reported results	√
Risk of bias	√
Overall risk of bias		√
Applicability	High	Low	Not clear
Subjects	√
Predictors	√
Outcome	√
Overall applicability	√

## Sheet: Luo et al
Results of evaluation
Deviation risk
Study subjects	Low risk of bias	High risk of bias	Not clear
	Yes/May be	No/Probably not	No information
Whether the data sources are appropriate	√
Whether the inclusion and exclusion criteria were appropriate for all study subjects		√
Risk of bias		√
Predictors	Low risk of bias	High risk of bias	Not clear
	Yes/May be	No/Probably not	No information
The definition and assessment of predictors were the same for all study subjects			√
Whether to evaluate predictors without knowing the outcome data	√
Whether the predictors included in the prediction model are valid or not	√
Risk of bias			√
Outcome	Low risk of bias	High risk of bias	Not clear
	Yes/May be	No/Probably not	No information
Whether the classification of the results is reasonable	√
Whether the definition of the outcome is reasonable	√
Whether the outcome was defined to exclude predictors	√
The definition of outcome was the same for all study subjects	√
Whether the information of predictors was not clear when determining the outcome			√
Whether the time interval for predictor assessment and outcome determination was reasonable	√
Risk of bias			√
Data Analysis	Low risk of bias	High risk of bias	Not clear
	Yes/May be	No/Probably not	No information
Whether the sample size is reasonable	√
Whether the treatment of continuous and categorical independent variables was justified	√
Whether all included subjects were included in the statistical analysis	√
Whether the included subjects with missing data were appropriately processed	√
Whether the screening of predictors by univariate analysis was avoided	√
Whether the complexity of the data is considered	√
Whether to evaluate the prediction model performance	√
Whether overfitting, underfitting, and optimal fitting of the prediction model were considered	√
Whether the predictors and their weights are consistent with the reported results	√
Risk of bias	√
Overall risk of bias		√
Applicability	High	Low	Not clear
Subjects	√
Predictors	√
Outcome	√
Overall applicability	√

[truncated: 8 more sheets: Lin et al, Yi et al, Wang et al, He et al, Gai et al, Zhao et al, Jesús et al, Kang et al]
